# Supplementary material
Source: PubMed Central journal article supplement (PMC4269798)
Supplement: mmc1.pdf [file mmc1.pdf]

# **Inherent Force-Dependent Properties of $\beta$ -Cardiac Myosin Contribute to the Force-Velocity Relationship of Cardiac Muscle**

Michael J. Greenberg,<sup>†</sup> Henry Shuman,<sup>†</sup> and E. Michael Ostap<sup>†\*</sup>

<sup>†</sup>Pennsylvania Muscle Institute and Department of Physiology, Perelman School of Medicine at the University of Pennsylvania, Philadelphia, PA, USA 19104-6083

\*Correspondence: ostap@mail.med.upenn.edu

## **Supporting Materials**

### **Detailed methods**

#### **Reagents, Proteins, and Buffers**

Using the method of Kielley and Bradley (1),  $\beta$ -cardiac myosin was prepared from porcine ventricles that were cryoground in liquid nitrogen (Pel-freez Biologicals). Porcine  $\beta$ CM is 97% identical to human  $\beta$ CM whereas murine ventricular myosin is only 92% identical to human  $\beta$ CM. N-ethylmaleimide modified myosin and actin were prepared from rabbit skeletal muscle as described (2). All actin was stabilized with a molar equivalent of rhodamine labeled phalloidin (Sigma). Unless otherwise mentioned, all experiments were conducted in KMg25 buffer (25 mM KCl, 1 mM DTT, 1 mM EDTA, 1 mM MgCl<sub>2</sub>, 60 mM MOPS pH 7.0). ATP concentrations were determined spectrophotometrically before each experiment by absorbance at 259 nm,  $\epsilon_{259} = 15,400 \text{ M}^{-1}\text{cm}^{-1}$ .

#### **Single Molecule Measurements**

Myosin was spun down in an ultracentrifuge at 386000 x g for 30 minutes in the presence of 1  $\mu$ M actin and 2 mM ATP to remove inactive protein (3). Motility chambers were prepared as previously described (2, 4). Solutions were added sequentially to the motility chambers as follows: 1 – 5 nM myosin in high salt buffer (KMg25 + 0.3 M KCl) (5 min); 1 mg/mL BSA in KMg25 (2x 5 min); 5 nM rhodamine-phalloidin decorated F-actin in KMg25 with 1 mg/mL glucose, magnesium ATP (either 10  $\mu$ M for the measurement of the working stroke or 4 mM for the measurements of the force-dependent detachment rate), 1 mg/mL BSA, 192 U/ml glucose oxidase, and 48  $\mu$ g/mL catalase (Sigma). Coated beads were then added to one side of the chamber to replace  $\sim 1/4$  the volume of the chamber. For the experiments measuring the size of the working stroke, bead-actin-bead dumbbells were constructed from 1  $\mu$ m polystyrene beads coated with N-ethylmaleimide myosin (2). For the experiments conducted at saturating ATP concentrations, biotinylated actin and NeutrAvidin-coated beads were used as bead-actin-bead dumbbells due to the ATP-sensitivity of N-ethylmaleimide myosin. 25% biotinylated actin (Cytoskeleton Inc.) was added to the unlabeled actin to make biotinylated actin filaments and 1  $\mu$ m polystyrene beads were incubated with NeutrAvidin overnight at room temperature. The chamber was sealed with silicon vacuum grease (Dow Corning).

Single molecule experiments were performed using the three-bead assay (5) as described previously (2, 4) in which an actin filament, strung between two optically-trapped beads, is brought in contact with a surface-attached bead that is sparsely coated with myosin. The trap stiffness for the measurement of the size of the working stroke was  $\sim 0.03$  pN/nm. Data were collected at 20 kHz and then filtered to 10 kHz. Single molecule interactions at low ATP were selected using a covariance threshold as described previously (2) and interactions at high ATP were selected using a variance threshold to improve the time resolution. The beginning of the binding event is detected as the point in time in which the variance/covariance drops below a certain threshold and the end of the binding event is detected as the point in time in which the variance/covariance rises above this same threshold as described previously (2). The directionality of the actin was determined by visual inspection of the data and confirmed by ensemble averaging of individual data traces. Measurements of the force dependence of actin detachment were conducted using the isometric optical clamp to apply a load to the myosin (2, 6). For all of the experiments, data were collected from  $>6$  different pedestals. The minimal temporal resolution for the data collected in the absence of the isometric optical clamp is 10 ms and 20 ms in the presence of the clamp.

### In Vitro Motility Assays

Myosin was spun down at  $386000 \times g$  for 30 minutes in high salt buffer in the presence of  $1 \mu\text{M}$  actin and  $2 \text{ mM}$  ATP to remove inactive protein (3). The concentration of protein was determined using a Bradford reaction. Myosin was diluted to  $140 \mu\text{g/mL}$  and either  $200 \text{ U}/\mu\text{L}$  of calf intestinal alkaline phosphatase or an equivalent volume of buffer was added to the myosin. The myosin was incubated for 30 minutes at  $37^\circ\text{C}$  to dephosphorylate the regulatory light chains and then kept on ice for 30 minutes. Motility chambers were constructed as previously described (2). Solutions were added to the flow chamber as follows:  $100 \mu\text{g/mL}$  myosin in high salt buffer (2 min);  $1 \text{ mg/mL}$  BSA in  $\text{KMg25}$  ( $2 \times 1$  min);  $1 \mu\text{M}$  phalloidin stabilized actin in  $\text{KMg25}$  (2 min);  $\text{KMg25} + 5 \text{ mM ATP}$  ( $2 \times$ );  $\text{KMg25}$  ( $4 \times$ );  $30 \text{ nM}$  rhodamine phalloidin stabilized actin in  $\text{KMg25}$ ; activation buffer ( $\text{KMg25}$  plus  $192 \text{ U/mL}$  glucose oxidase,  $48 \mu\text{g/mL}$  catalase (Sigma),  $1 \text{ mg/mL}$  glucose,  $5 \text{ mM ATP}$ , and  $0.5\%$  methyl cellulose). Experiments were conducted at room temperature ( $20^\circ\text{C}$ ). Data were collected at 2 seconds per frame for 1 minute and 25 filaments were manually tracked. We found no significant effect of light-chain dephosphorylation on the unloaded sliding velocity of the myosin ( $0.55 \pm 0.14 \mu\text{m/s}$  versus  $0.53 \pm 0.16 \mu\text{m/s}$  for untreated and treated myosin respectively;  $p=0.56$ ).

### Data and Statistical Analysis

Ensemble averages of the working stroke were constructed as previously described (2) and single exponential functions were fit to the data. To improve the signal-to-noise ratio, the traces from each bead were averaged before ensemble averaging. Reported errors are the standard errors of the fits to the data and are not a measurement of the variance in the population of events. It is important for us to note that the estimate of the error in the determined parameters is likely underestimated due to the extensions of the interactions, which is necessary for ensemble averaging.

For the experiments examining the force dependence of the actomyosin attachment durations, the relationship between the detachment rate and force,  $k(F)$  was modeled as a single-step process:

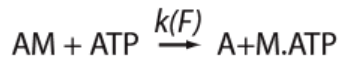

Scheme 1

It is worth noting that the modeling does not depend on the nucleotide state of the myosin and therefore, this transition could just as easily start from a state binding ADP or ADP\*Pi. The force dependence of the detachment rate was modeled using Equation 1. Given such a model, the distribution of attachment durations at a given force will be exponentially distributed. The model was fit to the data using maximum likelihood estimation (MLE) (2), permitting the measurement of both  $k_0$  and  $d_{\text{det}}$ .

MLE analysis has been widely adopted in the single molecule field because it has several advantages over other fitting algorithms.

(1) Ordinary least squares fitting (a special case of the MLE), the most commonly used algorithm for fitting, assumes that all measurement errors are normally distributed. As such, it is very sensitive to outlying points. A more robust MLE fitting routine is less sensitive to outlying points. Moreover, least-squares fitting requires that (1) each measurement is independent and identically distributed and (2) the errors are normally distributed. In the case of single molecule data, there are often global constraints (e.g. the temporal resolution of the instrument) that cause a violation of these conditions and as such, standard fitting approaches are inaccurate and more robust fitting methods must be applied.

(2) Binning the data to generate histograms and then fitting distribution functions to those histograms causes information to be lost. The errors of the fit will depend on the size of the bins as well as the number of counts in each bin. As such, the measurement of error depends on the generation of the histograms themselves. MLE fitting does not require binning and therefore it does not suffer from this issue. Moreover, binning of force dependence data acquired here would cause deviations of the data from single exponential functions since each bin would include a range of forces, each with its own exponential rate constant (see Fig. S1).

(3) In our data, there are short-lived binding events that we are unable to resolve due to the temporal resolution of the experiment that lead to an underestimate of the mean detachment rate (a classical statistical parameter) (Fig. 2B). While it is true that the mean value of an exponentially decaying function is equal to the characteristic rate, the missing short-lived binding events will cause this rate to be underestimated. By using MLE fitting of the distribution to the data, it is possible to correct for this missing data.

95% confidence intervals for the MLE fitting were determined using bootstrapping simulations as we have done previously (2, 4). For each bootstrapped simulation, MLE fitting was used to determine the best-fit value (Fig. S2). The initial starting conditions for the fits were randomized using an annealing routine. 95% confidence intervals were calculated by determining the interval over which 95% of the simulated values were found.

### Simulation of the Force Dependence of Cardiac Myosin

At high ATP concentrations there is a percentage of binding events that are below the temporal resolution of our instrument (20 ms). To test robustness of the MLE fitting routine where a percentage of the events are below the detection threshold, Monte Carlo simulations of the force-attachment duration relationship were generated in Matlab (Fig. S3). The forces measured in the feedback experiments are normally distributed to a first order approximation. A random number was drawn from a Gaussian distribution with a mean and standard deviation that matches the distribution of the experimental data set. Using this force and the values of  $d_{det}$  (0.97 nm) and  $k_0$  ( $71 \text{ s}^{-1}$ ) determined from MLE fitting of the experimental data set, a random exponentially distributed number was selected from a distribution with a mean given by equation 1. This selection was repeated to generate a data set with 10000 points. From this data set, all events with a duration less than the temporal resolution of the experiment (20 ms) were removed. From the remaining simulated data set, 262 remaining binding events were selected to give a synthetic data set with the same size as the experimental data set. MLE fitting of this data set followed by 1000 rounds of bootstrapping simulations were carried out as described above to determine the best fit values and 95% confidence intervals.

### Comparison of the Measured and Expected Mean Detachment Rates

MLE fitting of Equation 1 to the data assumes an exponential distribution of attachment durations at every force. When collecting the data at high ATP concentrations there are many binding events that are below the temporal resolution of our instrument. As such, the measured mean attachment duration will be greater than the true mean attachment duration calculated via MLE. As discussed above and demonstrated in Fig. S3, MLE fitting will provide the correct measurement of the parameters even when some events have durations below the temporal resolution of the instrument. To investigate how our measured mean attachment duration agrees with the expected mean attachment duration based on the parameters determined using MLE fitting and temporal resolution of the instrument, we note that the probability density function for the attachment duration as a function of force is given by:

$$PDF(F, t) = k(F) * e^{-k(F)*t} \quad (\text{Equation S1})$$

where  $t$  is the attachment duration and the force dependence of the detachment rate (i.e.  $k(F)$ ) is given by equation 1. The expected mean value of the attachment duration measured at each force is given by:

$$\langle t \rangle = \frac{\int_{t_o}^{t_f} t * PDF(F, t) dt}{\int_{t_o}^{t_f} PDF(F, t) dt} = \frac{\int_{t_o}^{t_f} t * k(F) * e^{-k(F)*t} dt}{\int_{t_o}^{t_f} k(F) * e^{-k(F)*t} dt} \quad (\text{Equation S2})$$

where  $t_o$  is the minimum observable event duration and  $t_f$  is the maximal event duration. Using the values for  $k_0$  and  $d_{det}$  obtained from the MLE fitting, it is possible to calculate the expected mean attachment duration as a function of force, given the limited temporal resolution of the instrument. As can be seen (Figure 2B), the measured mean attachment rate (black dots) agrees well with the theoretical mean detachment rate based on the MLE fitting and the limited

temporal resolution of the instrument (blue curve). Error bars were determined by binning the data by force, generating 1000 bootstrap simulations of the data, and then calculating the standard deviation of these simulations. This was necessary due to the fact that points in each bin are exponentially, not normally distributed. It should be emphasized that the correct measurement is obtained from MLE fitting of the data and that this correction is not necessary to determine the values of  $k_0$  and  $d_{\text{det}}$ .

## Supporting Figure Legends

**Figure S1:** Cumulative dwell time distributions for data collected using the isometric optical clamp. Data were separated into low force (<2 pN, blue) or high force (>3 pN, red) events and cumulative dwell distributions were constructed. It should be noted that binning the data over a range of forces will result in an additional slow phase in the data due to force-induced slowing of the myosin kinetics over the wide range of forces included in each histogram. The cumulative dwell distribution (CDD) is given by:

$$CDD = y_0 - a * \exp(-k * x) \quad (\text{Equation S3})$$

where  $k$  is the rate of underlying process and  $y_0$  and  $a$  are fitting parameters to correct for the fact that some events are below the detection threshold of the instrument. Fitting the distribution to the low force data, one obtains a rate of  $58 \pm 6 \text{ s}^{-1}$ , similar to the rate over this force range obtained from MLE fitting of the full data set (Fig. 2). Fitting the distribution to the high force data, one obtains a rate of  $34 \pm 2 \text{ s}^{-1}$ , similar to the rate over this force range obtained from MLE fitting of the full data set (Fig. 2). The high force data shows an additional slow component (<10% of the total amplitude) that is expected since binning the data over a wide range of forces will yield a range of force dependent rates. Taken together, the fitting shows that (1) the data are approximately exponentially distributed at each force, (2) forces that resist the working stroke slow the rate of actomyosin detachment, (3) the rates obtained with the MLE fitting of entire data set agree well with the rates measured from subsets of the data, and (4) despite missing some fast events, the data still allow for accurate determination of the rate constant that defines the primary force-sensitive transition.

**Figure S2:** Distribution of parameters determined from MLE fitting of the 1000 rounds of bootstrapping simulations. To determine the confidence intervals for the parameters  $d_{\text{det}}$  and  $k_0$  determined via MLE fitting of the experimental data set, 1000 bootstrapped simulations of the data were generated. Bootstrapping of the data examines the sensitivity of the best-fit MLE parameters to outliers. For each simulation, MLE fitting of the data was used to determine the values  $d_{\text{det}}$  and  $k_0$  from the simulated data. The starting values for each round of MLE fitting were randomized via several rounds of annealing to ensure that the results were not biased by the initial values. Shown are the histograms of the MLE best-fit values for (A)  $d_{\text{det}}$  and (B)  $k_0$  for each simulation. The inset shows a magnification of the peak region. As can be seen, the values of  $d_{\text{det}}$  (0.97 nm) and  $k_0$  ( $71 \text{ s}^{-1}$ ) determined from MLE fitting of the experimental data set agree well with the peaks of the histograms determined from the simulated data, showing that the MLE fit of the real data set is not biased by outlying points. Moreover, the values are tightly clustered around a single value without additional peaks, demonstrating that the values determined from MLE fitting of the experimental data are (1) not due to a local minima and (2) well defined by the data set.

**Figure S3:** Simulated data set showing the theoretical distribution of attachment durations. Using the values of  $d_{\text{det}}$  (0.97 nm) and  $k_0$  ( $71 \text{ s}^{-1}$ ) determined from MLE fitting of the experimental data set and the minimum observable event duration (20 ms), a simulated data set with an equal number of points as the measured data set was generated. The experimental data set is colored red and the simulated data set is colored black. MLE fitting of the simulated data

set followed by 1000 rounds of bootstrapping yielded values of  $d_{\text{det}}$  (0.98 (-0.002/+0.001) nm) and  $k_0$  ( $70 \pm 0.11 \text{ s}^{-1}$ ) that agrees well with the input parameters to the simulation and the experimental data set. This demonstrates that MLE fitting is able to accurately determine values of  $d_{\text{det}}$  and  $k_0$  with a simulated data set that has the same number of points and minimum observable event duration as the experimental data set.

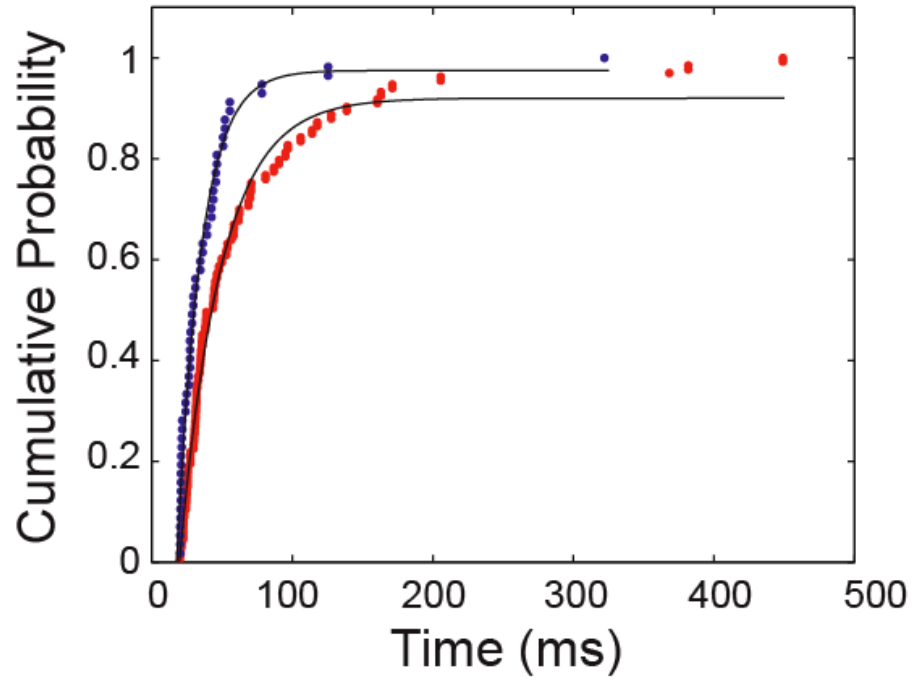

Figure S1



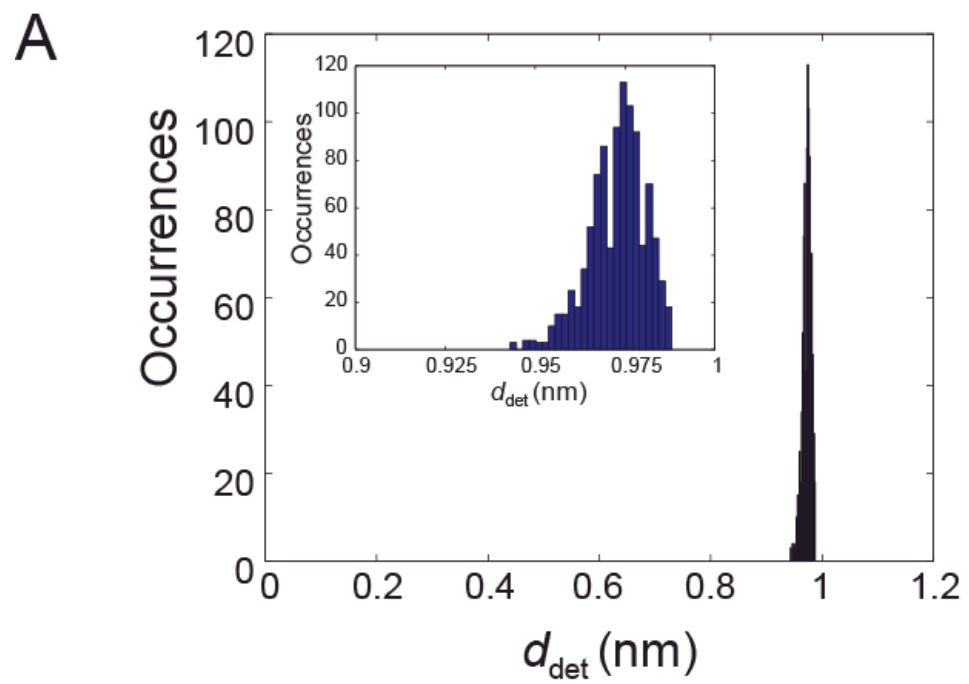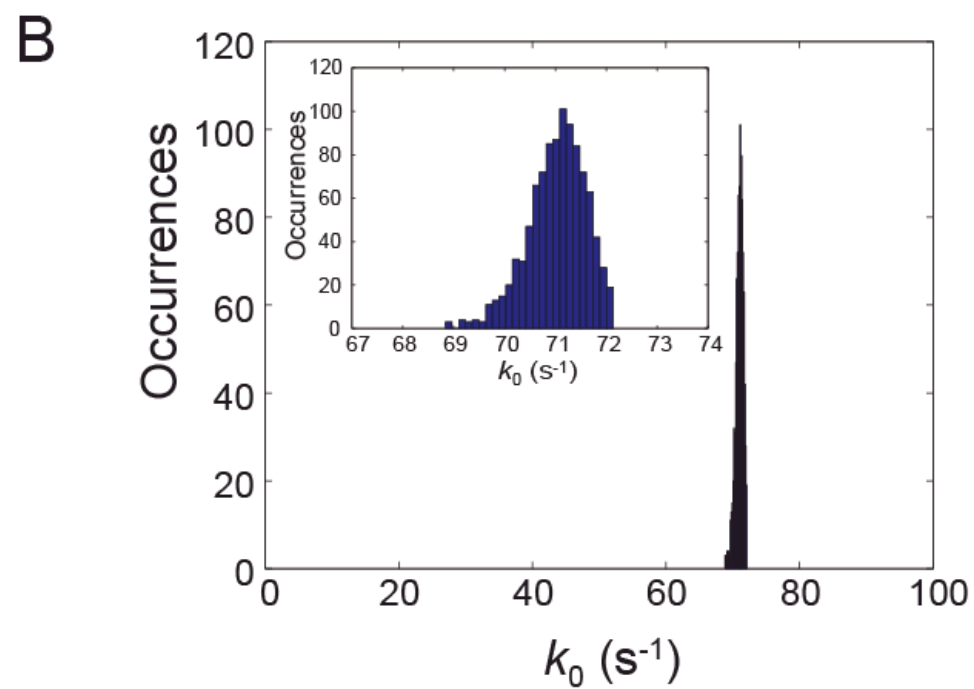

Figure S2

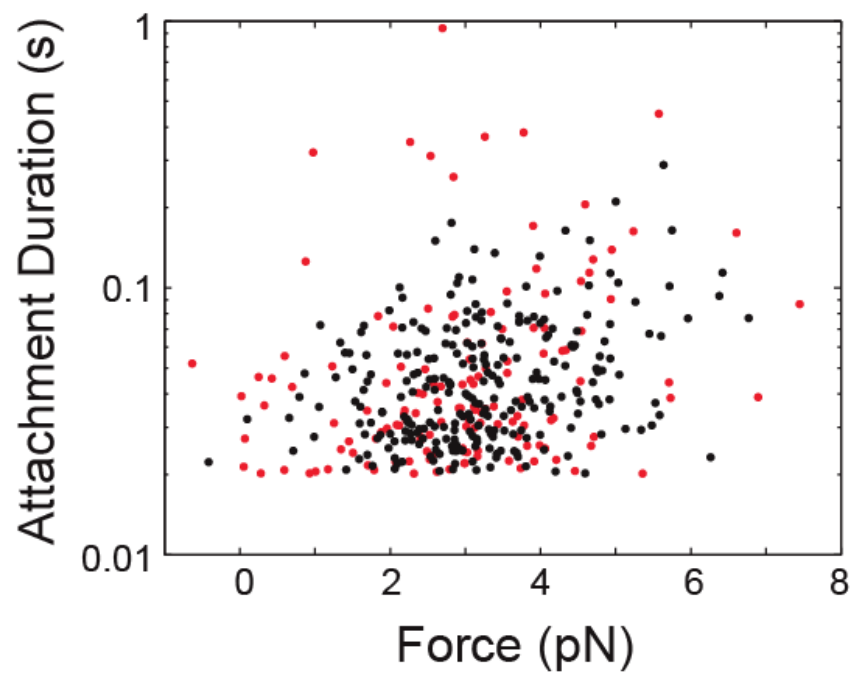

Figure S3

## Supporting References

1. Kielley, W. W., and L. B. Bradley. 1956. The relationship between sulfhydryl groups and the activation of myosin adenosinetriphosphatase. *The Journal of biological chemistry* 218:653-659.
2. Laakso, J. M., J. H. Lewis, H. Shuman, and E. M. Ostap. 2008. Myosin I can act as a molecular force sensor. *Science* 321:133-136.
3. Greenberg, M. J., K. Kazmierczak, D. Szczesna-Cordary, and J. R. Moore. 2010. Cardiomyopathy-linked myosin regulatory light chain mutations disrupt myosin strain-dependent biochemistry. *Proceedings of the National Academy of Sciences of the United States of America* 107:17403-17408.
4. Greenberg, M. J., T. Lin, Y. E. Goldman, H. Shuman, and E. M. Ostap. 2012. Myosin IC generates power over a range of loads via a new tension-sensing mechanism. *Proceedings of the National Academy of Sciences of the United States of America* 109:E2433-2440.
5. Finer, J. T., R. M. Simmons, and J. A. Spudich. 1994. Single myosin molecule mechanics: piconewton forces and nanometre steps. *Nature* 368:113-119.
6. Takagi, Y., E. E. Homsher, Y. E. Goldman, and H. Shuman. 2006. Force generation in single conventional actomyosin complexes under high dynamic load. *Biophysical journal* 90:1295-1307.
